1 **Title: Collateral positives of COVID-19 for culturally and linguistically diverse communities in**  
2 **Western Sydney, Australia**

3  
4 **Authors:** Cornell S\*<sup>1</sup>, Ayre J<sup>1</sup>, Mac O<sup>1</sup>, Kapoor R<sup>1</sup>, Pickles K<sup>1</sup>, Batcup C<sup>1</sup>, Dolan H<sup>1</sup>, Bonner C<sup>1</sup>, Cvejic E<sup>1</sup>,  
5 Mouwad D<sup>2</sup>, Zachariah D<sup>2</sup>, Turalic U<sup>3</sup>, Santalucia Y<sup>4</sup>, Chen T<sup>2</sup>, Vasic G<sup>2</sup>, McCaffery K<sup>1</sup>, Muscat DM<sup>1</sup>

6  
7 **Affiliations:**

8 <sup>1</sup>The University of Sydney, Sydney Health Literacy Lab, School of Public Health, Faculty of Medicine  
9 and Health, New South Wales AUSTRALIA

10 <sup>2</sup>Western Sydney Local Health District, New South Wales AUSTRALIA

11 <sup>3</sup>Nepean Blue Mountains Local Health District, New South Wales AUSTRALIA

12 <sup>4</sup>Southwestern Sydney Local Health District, New South Wales AUSTRALIA

13

14 **Funding:** This study was not specifically funded. Academic authors are funded by National Health  
15 and Medical Research Council, Western Sydney Local Health District Research and Education  
16 Network, and National Heart Foundation.

17

18 **Conflict of Interests:** The authors declare that they have no competing interests.

19

20 **Corresponding author:**

21 Samuel Cornell

22 School of Public Health. Room 128A Edward Ford Building (A27), The University of Sydney,  
23 NSW, 2006.

24 Email: [samuel.cornell@sydney.edu.au](mailto:samuel.cornell@sydney.edu.au)

25

26 **Acknowledgements:** We would like to acknowledge and thank the community members who  
27 participated in this survey and the team who co-designed the survey, recruited the participants and  
28 collected the data.

29

30 **Data statement:** Data may be accessed upon reasonable request from the authorship team.

31

32 **Ethics statement:** Western Sydney Local Health District Human Research Ethics Committee (Project  
33 number 2020/ETH03085).

34

35 **Contributors:** All authors were involved in the conception and design of the study, developing the  
36 methods, and coordinating the running of the study. KP developed the coding framework, based on  
37 a previously reported framework developed by SC, and all authors contributed to the framework.  
38 DMM, JA, OM, RK and EC contributed to the analysis. SC and DMM drafted the manuscript and all  
39 authors reviewed and edited the manuscript. All authors have read and agreed to the published  
40 version of the manuscript.

41

42

43 **Abstract**

44

45 **Issues addressed:**

46 To investigate whether culturally and linguistically diverse communities in Western Sydney have  
47 experienced any positive effects during the COVID-19 pandemic, and if so, what these were.

48

49 **Methods:**

50 A cross-sectional survey with ten language groups was conducted from 21<sup>st</sup> March to 9<sup>th</sup> July 2021 in  
51 Sydney, Australia. Participants were recruited through bilingual multicultural health staff and health  
52 care interpreter service staff and answered a question, 'In your life, have you experienced any  
53 positive effects from the COVID-19 pandemic?' Differences were explored by demographic variables.  
54 Free-text responses were thematically coded using the Content Analysis method.

55

56 **Results:**

57 707 people completed the survey, aged 18 to >70, 49% males and 51% females. Only 161 (23%) of  
58 those surveyed reported any positive impacts. There were significant differences in the proportion  
59 of those who reported positives based on age ( $p=0.004$ ), gender ( $p=0.013$ ), language ( $p=0.003$ ),  
60 health literacy ( $p=0.014$ ), English language proficiency ( $p=0.003$ ), education ( $p<0.001$ ) and whether  
61 participants had children less than 18 years at home ( $p=0.001$ ). Reporting of positive impacts ranged  
62 from 12% for people aged seventy years or older to 30% for the 30–49-year age group. Reporting of  
63 positive impacts for different language groups ranged from 9% to 42%. 18% of men reported  
64 positive impacts compared to 27% of women, and 18% of people with inadequate health literacy  
65 reported positive impacts compared to 26% with adequate health literacy. Content Analysis of open-  
66 ended responses showed that, of those that did report positives, the top themes were 'Family time'  
67 (44%), 'Improved self-care' (31%) and 'Greater connection with others' (17%).

68

69 **Conclusions:**

70 From 21st March to July 9th, 2021, few surveyed participants reported finding any positives because  
71 of the COVID-19 pandemic. This finding is in stark contrast to related research in Australia in a  
72 population dominated by adults with English as their first language, carried out in June 2020, in  
73 which many more people experienced positives.

74

75 So what:

76 The needs of people from culturally and linguistically diverse backgrounds must inform future  
77 responses to community crises to facilitate an equitable effect of any collateral positives that may  
78 arise.

79

80

81 Introduction

82

83 The COVID-19 pandemic has impacted Australia since March 2020 and has been costly for the  
84 Australian population with widespread restrictions on movement and work between periods of  
85 control. Nevertheless, Australians have shown resilience (1); they have identified positives as a side  
86 effect of restrictions (2) and generally complied well with public health directives; with high  
87 compliance rates reported by across multiple studies (3,4).

88

89 The negative effects of the pandemic have been widely reported. However, research has found that  
90 people have adapted to the novel circumstances and often found positives amidst the disorder.  
91 Previous research, conducted by our group in June 2020, with a national sample of Australians,  
92 found that 70% of participants had experienced positive effects of COVID-19; The three most  
93 common themes were 'Family time' (33%), 'Work flexibility' (29%) and 'Calmer life' (19%)(2).  
94 Similarly, a study from Scotland conducted during weeks 9-12 of the Scottish lockdown from May to  
95 June 2020 found that participants reported feeling fitter, better rested and calmer—83% being more  
96 appreciative of things usually taken for granted, 67% more time doing enjoyable things, 62% paying  
97 more attention their health and 54% increasing their amount of exercise (5). Furthermore, another  
98 Australian, qualitative, longitudinal survey found mixed responses from participants regarding the  
99 effects of COVID-19 on their family relationships—in which participants described feelings of loss  
100 and strains on relationships, but also of developing positive characteristics such as appreciation,  
101 gratitude, and tolerance and opportunities for strengthening family bonds (6).

102

103 Nevertheless, as with most aspects of health, previous research has not found an equitable  
104 distribution of positive experience, with those of higher socioeconomic status more likely to find  
105 positives, including working from home for pay and financial benefits; (5) while many existing  
106 inequities between the socioeconomic stratum have been exacerbated during COVID-19 (7,8).  
107 Furthermore, few studies have specifically aimed to ascertain the positive experience, if any, of  
108 those from culturally and linguistically diverse backgrounds. It is important to identify groups and  
109 populations which may not experience any positive effects arising from a disaster including a  
110 pandemic. This may be due to already present socioeconomic disparities which may be exacerbated  
111 from the detrimental effects of lockdowns and other pandemic related side-effects (9).

112

113 In this brief report, we present results from our survey conducted from March 21st to July 9th, 2021  
114 survey which examined behaviour and intentions, information sources, and impacts of COVID-19

115 amongst people from culturally and linguistically diverse backgrounds in Greater Western Sydney. As  
116 part of the survey, we asked whether they had experienced any positive effects during the COVID-  
117 19 pandemic, and what those positive effects were.

## 118 2. Methods

119

### 120 2.1 Study design

121

122 This study involved a self-report cross-sectional survey with 11 language groups, approved by  
123 Western Sydney Local Health District Human Research Ethics Committee (Project number  
124 2020/ETH03085).

125

### 126 2.2 Setting

127

128 Throughout the COVID-19 pandemic there has been numerous lockdowns and phases of restrictions  
129 affecting the residents of Sydney, New South Wales with concurrent widespread disruption to the  
130 daily lives of residents. The survey was conducted from March 21<sup>st</sup> to July 9<sup>th</sup>, 2021. During this  
131 period, the COVID-19 vaccines had begun to roll out across Australia, and daily cases in NSW ranged  
132 from 0 to 46 (10). Stay at home orders (informally known as ‘lockdown’) were implemented across  
133 Greater Sydney on June 23<sup>rd</sup> (11). On the day the survey closed (July 9<sup>th</sup>) the New South Wales (NSW)  
134 daily case count was 45.

135

136 Participants were recruited from Greater Western Sydney in NSW, Australia from three adjoining  
137 regions with high cultural diversity: Western Sydney, Southwestern Sydney, and Nepean Blue  
138 Mountains. Up to 39% of residents in these regions were born overseas in non-English speaking  
139 countries (12).

140

### 141 2.3 Participants

142

143 Participants were eligible to take part if they were aged 18 or over and spoke one of the following as  
144 their main language at home: Arabic, Assyrian, Chinese (Mandarin or Cantonese), Croatian, Dari,  
145 Dinka, Hindi, Khmer, Samoan, Tongan, Spanish. Further details on participants are reported  
146 elsewhere (REF).

147

## 148 2.4 Recruitment

149

150 Participants were recruited through bilingual multicultural health staff and Health Care Interpreter  
151 Service staff. Further details on recruitment are reported elsewhere (13).

152

## 153 2.5 Measures

154

155 Demographic survey items included age, gender, education, whether born in Australia, years living in  
156 Australia, main language spoken at home, English language proficiency, reading proficiency in  
157 language spoken at home, access to the internet, smartphones, chronic disease status, and a single-  
158 item health literacy screener (14). The socioeconomic status of the area of residence for each  
159 individual was defined based on the SEIFA Index of Relative Socioeconomic Advantage and  
160 Disadvantage (IRSAD (15)). IRSAD aligns the statistical local area with a decile ranking (1–10),  
161 with lower scores indicating greater socioeconomic disadvantage. The IRSAD decile was not available  
162 for some participants (n=5), for example, because they had entered digits that did not correspond to  
163 a valid Australian postcode. IRSAD decile for these participants was replaced with the median IRSAD  
164 decile for speakers of the same language in the sample. For the analysis, IRSAD deciles were recoded  
165 into quintiles, and dichotomised (lowest quintile vs other).

166

167 Positive impacts of COVID–19 was assessed with a single-item, “In your life, have there been any  
168 positive effects from the COVID–19 pandemic?”. Participants answered yes or no and could then  
169 provide free text feedback.

170

## 171 2.6 Quantitative analysis

172

173 Quantitative data were analysed using IBM SPSS Statistics Version 26. Descriptive statistics were  
174 generated for demographic characteristics of the analysed sample. Within each language group,  
175 frequencies were weighted to reflect population (census data) gender and age group distributions  
176 (18-29 years, 30-49 years, 50-69 years, ≥70 years). A single participant indicated their gender as  
177 ‘other’ and was unable to be included in weighted analyses. Total recruitment for the Spanish  
178 language group were low (<50), with notable gaps for some age groups. For this reason, results for  
179 this language group are not presented in the analysis but are included in total frequencies. For the  
180 single item “positives”, descriptive statistics were generated by age, gender, and health literacy,  
181 IRSAD and comorbidities. Chi-square tests were conducted to test for between-group differences in

182 categorical variables. P values less than 0.05 were considered statistically significant. Descriptive  
183 statistics were also generated for “positives” by language group and free text responses were  
184 analysed via Content Analysis.

185

## 186 [2.7 Content Analysis](#)

187

188 Free-text responses to the item about positive impacts were analysed using Content Analysis (16), a  
189 widely used analysis method which combines qualitative and quantitative methods to analyse text  
190 data, allowing the content and frequency of categories to be reported. One member of the research  
191 team (KP) first read through all the valid free-text responses (n=144) and developed the initial coding  
192 framework, based on a previously reported framework developed by SC (2), which was reviewed by  
193 the research team. 30 responses (~20%) were double coded independently by two members of the  
194 research team (OM and RK). Level of agreement was tested using Cohen's kappa (18) and indicated  
195 substantial agreement ( $\kappa = 0.78$ ). OM and RK then independently coded the remaining responses.  
196 The frequency of each code and main themes are reported.

## 197 [Results](#)

### 198 [Sample characteristics](#)

199 We had a total of 708 respondents. Sample characteristics are summarised in Table 1. The mean age  
200 was 45.4 years (standard error [SE] 0.78; range 18–91 years), and 51% of respondents were female  
201 (n=363). Most participants (88%, n=622) were born in a country other than Australia; 31% reported  
202 that they did not speak English well or at all (n=220); 70% had no tertiary qualifications (n=497).  
203 Inadequate health literacy was identified for 41% of the sample (n=290).



204 **Table 1.** Descriptive statistics of the total sample and those who reported positives.

| <b>Variable</b>                                                                                | <b>Total number of sample<br/>N (%)</b> | <b>Total number reported positives with significance<br/>n (%)</b> | <b>P value<sup>#</sup></b> |
|------------------------------------------------------------------------------------------------|-----------------------------------------|--------------------------------------------------------------------|----------------------------|
| <b>Age group</b>                                                                               |                                         |                                                                    | <b>0.004</b>               |
| 18-29                                                                                          | 147 (20.7)                              | 28 (19.3)                                                          |                            |
| 30-49                                                                                          | 295 (41.8)                              | 90 (30.5)                                                          |                            |
| 50-69                                                                                          | 193 (27.3)                              | 34 (17.7)                                                          |                            |
| >70                                                                                            | 72 (10.2)                               | 9 (12.5)                                                           |                            |
| <b>Gender*</b>                                                                                 |                                         |                                                                    | <b>0.013</b>               |
| Male                                                                                           | 344 (48.6)                              | 61 (17.9)                                                          |                            |
| Female                                                                                         | 363 (51.4)                              | 100 (27.5)                                                         |                            |
| <b>Language</b>                                                                                |                                         |                                                                    | <b>0.003</b>               |
| Arabic                                                                                         | 80 (11.3)                               | 161 (22.8)                                                         |                            |
| Assyrian                                                                                       | 133 (18.8)                              | 25 (31.7)                                                          |                            |
| Chinese                                                                                        | 76 (17.1)                               | 25 (18.6)                                                          |                            |
| Croatian                                                                                       | 121 (6.2)                               | 11 (8.6)                                                           |                            |
| Dari                                                                                           | 44 (8.9)                                | 11 (24.4)                                                          |                            |
| Dinka                                                                                          | 63 (5.9)                                | 17 (26.8)                                                          |                            |
| Hindi                                                                                          | 42 (8.9)                                | 18 (42.0)                                                          |                            |
| Khmer                                                                                          | 63 (10.7)                               | 7 (10.5)                                                           |                            |
| Spanish**                                                                                      | 43 (5.9)                                | 25 (33.1)                                                          |                            |
| Samoan/Tongan                                                                                  | 42 (6.1)                                | 12 (28.3)                                                          |                            |
| <b>English language proficiency (How well do you speak English?)</b>                           |                                         |                                                                    | <b>0.003</b>               |
| Very well/ well                                                                                | 487 (68.9)                              | 127 (26.2)                                                         |                            |
| Not well/not at all                                                                            | 220 (31.1)                              | 34 (15.4)                                                          |                            |
| <b>Literacy in a language other than English (How well do you read in your main language?)</b> |                                         |                                                                    | 0.774                      |
| Very well/ well                                                                                | 589 (83.4)                              | 136 (23.1)                                                         |                            |
| Not well/not at all                                                                            | 118 (16.6)                              | 25 (21.6)                                                          |                            |
| <b>Health literacy***</b>                                                                      |                                         |                                                                    | <b>0.014</b>               |
| Adequate                                                                                       | 417 (58.9)                              | 110 (26.5)                                                         |                            |
| Inadequate                                                                                     | 290 (41.1)                              | 51 (17.6)                                                          |                            |
| <b>Education</b>                                                                               |                                         |                                                                    | <b>&lt;0.001</b>           |
| Bachelor degree or above                                                                       | 210 (29.7)                              | 77 (10.9)                                                          |                            |
| Below bachelor degree                                                                          | 497 (70.3)                              | 84 (11.9)                                                          |                            |
| <b>Years living in Australia</b>                                                               |                                         |                                                                    | 0.778                      |
| 5 years or less                                                                                | 120 (16.9)                              | 31 (26.1)                                                          |                            |
| 6 to 10 years                                                                                  | 104 (14.7)                              | 20 (19.3)                                                          |                            |
| More than 10 years                                                                             | 398 (56.4)                              | 92 (23.2)                                                          |                            |
| Born in Australia                                                                              | 85 (12.0)                               | 18 (20.7)                                                          |                            |
| <b>IRSAD quintile</b>                                                                          |                                         |                                                                    | 0.908                      |
| Lowest                                                                                         | 224 (31.7)                              | 52 (23.1)                                                          |                            |
| Not lowest                                                                                     | 383 (68.3)                              | 109 (22.7)                                                         |                            |
| <b>Self-reported chronic health conditions<sup>^</sup></b>                                     |                                         |                                                                    | 0.280                      |
| 0                                                                                              | 421 (59.6)                              | 106 (25.3)                                                         |                            |
| 1                                                                                              | 154 (21.8)                              | 31 (20.2)                                                          |                            |
| 2 or more                                                                                      | 132 (18.6)                              | 24 (18.2)                                                          |                            |
| <b>Children less than 18 years</b>                                                             |                                         |                                                                    | <b>&lt;0.001</b>           |

|                             |            |           |       |
|-----------------------------|------------|-----------|-------|
| Yes                         | 262 (37.1) | 82 (31.4) |       |
| No                          | 445 (62.9) | 79 (11.2) |       |
| <b>Change in employment</b> |            |           | 0.316 |
| Yes                         | 273 (38.6) | 69 (25.3) |       |
| No                          | 434 (61.4) | 92 (13.1) |       |
| <b>Total</b>                | 707        | 161       |       |

205 Frequencies are weighted (using post-stratification weighting) to reflect each language group's gender and age group  
 206 distribution (18-29 years, 30-49 years, 50-69 years, ≥70 years) based on 2016 census data for Western Sydney, South  
 207 Western Sydney, and Nepean Blue Mountains' combined populations (17).

208 \* 1 respondent indicated 'other/prefer not to say'

209 \*\* Spanish/Tongan numbers were too small and not included in analysis by language group.

210 \*\*\* Based on the Single Item Literacy Screener (SILS) (10).

211 ^ Self-reported chronic health conditions included respiratory disease, asthma, chronic obstructive pulmonary disease, high  
 212 blood pressure, cancer, heart disease, stroke, diabetes, depression, or anxiety.

213 # P value indicates the significance between groups based on chi-square tests.

214

## 215 Positive impacts

216

217 Across the entire sample, only 23% of people reported that there had been any positive impacts of  
 218 COVID-19 (n=161). Number of people reporting positives by group is summarised in Table 1.  
 219 Reporting of positive impacts ranged from 12% (n=9) for people aged seventy years or older to 30%  
 220 (n=90) for the 30-49-year age group. There were significant differences across language groups  
 221 (p<0.001), the range was between 9% (n=11) for Croatian speakers, to 42% (n=18) for Hindi  
 222 speakers. There were significant differences across genders; 18% (n=61) of men reported positive  
 223 impacts compared to 27.5% (n=100) of women (p=0.004), and 18% (n=51) of people with inadequate  
 224 health literacy reported positive impacts compared to 26% (n=110) with adequate health literacy  
 225 (p=0.014). There was no significant difference among participants who did or did not report chronic  
 226 health conditions when finding positives; 25% (n=106) of people with no self-reported chronic health  
 227 conditions reported positives compared to 20% (n=31) with one and 18% (n=24) with two or more  
 228 self-reported chronic health conditions (p=0.280). There was no significant difference between 23%  
 229 (n=52) of participants in the lowest IRSAD quintile reported positives compared to 23% (n=109) not  
 230 in the lowest. The proportion of people reporting positives was significantly higher for people with  
 231 children less than 18 years (31%, n=82) compared to those without (11%, n=79; p=0.001). There was  
 232 no significant difference for those who reported positives between those who had experienced a  
 233 change in employment status and those who had not (p=0.316).

234

## 235 Content Analysis

236

237 Of the 161 participants who identified positive effects of COVID-19, 144 provided a written response  
 238 detailing their positive experience(s).

239 The three most reported themes were as follows (Table 2):

- 240 1. ‘Family time’ (44.4%, n=64), in which participants described the positive effects of being able  
 241 to spend more time with their family (either online or within their home) and a feeling of  
 242 greater appreciation for their loved ones.  
 243 2. ‘Developed good habits and improved self-care’ (31.3%, n=45) with participants explaining  
 244 that they had more time to give to their own wellbeing.  
 245 3. ‘Greater connection with others’ (17.4%, n=25) with participants highlighting the time  
 246 together during the pandemic had enabled a deeper connection with others in their  
 247 community.

248

249 Other major themes in which more than 10% of participants identified positive effects included the  
 250 following: (4) Staying at home; (5) Financial benefit, and (6) Work flexibility.

251

252

253 **Table 2.** Themes identified in free-text responses to question ‘In your life, have you had any positive  
 254 effects from the COVID-19 pandemic’ with example quote, shown in decreasing order of frequency,  
 255 of those who reported a positive

| Theme*                                       | Example quote                                                                                                                                                                                                                                     | N  | %    |
|----------------------------------------------|---------------------------------------------------------------------------------------------------------------------------------------------------------------------------------------------------------------------------------------------------|----|------|
| More time with family                        | <i>“It made family members spend more time together” “More quality family time especially when we had a semi lockdown”</i>                                                                                                                        | 64 | 44.4 |
| Developed good habits and improved self-care | <i>“Pay more attention to developing good habits of personal hygiene, developing a healthy lifestyle” “...doing exercise and taking care of the diet”</i>                                                                                         | 45 | 31.3 |
| Greater connection with others               | <i>“We’re closer as a family, with co-workers and with the community” “I now cherish friendships and family relationships even more than I used to”</i>                                                                                           | 25 | 17.4 |
| Staying at home                              | <i>“Am a homebody so enjoyed not having to go out”</i>                                                                                                                                                                                            | 19 | 13.2 |
| Financial benefit                            | <i>“I was able to spend less money going out and socialising”</i>                                                                                                                                                                                 | 11 | 7.6  |
| Work flexibility                             | <i>“Working from home for some days”</i>                                                                                                                                                                                                          | 11 | 7.6  |
| Increased time for hobbies and leisure       | <i>“Learning to grow vegetables and flowers, learning to cook”</i>                                                                                                                                                                                | 8  | 5.6  |
| Gained perspective                           | <i>“To value things, not allowing time to past not doing anything, reflect on what is important and what is not, be grateful for what I have and that I am not in need”</i>                                                                       | 8  | 5.6  |
| Less time commuting                          | <i>“Working remotely saves on the time to be spent on the commute”</i>                                                                                                                                                                            | 4  | 2.8  |
| Mental health improvement                    | <i>“Pay more attention to physical and mental health issues, increase the amount of exercise outdoor, pay more attention to people who need assistance, decline unnecessary social events, the betterment of one’s inner-self/ spirituality.”</i> | 2  | 0.1  |

256 \*Categories are not mutually exclusive

257

258 Discussion

259

260 The findings of this paper illustrate the experiences of people from culturally and linguistically  
261 diverse communities living in greater Sydney, in which only 23% identified positive impacts  
262 stemming from the COVID-19 pandemic. Nevertheless, although fewer participants in the current  
263 study acknowledged positives compared to our previous research with a general Australian  
264 population in June 2020, the responses differed by frequency, but not by kind. There are strong  
265 similarities between the predominant themes of this study, contrasted to our previous work, in  
266 which the top themes were, 'family time', 'work flexibility' and 'calmer life'. It is notable that, in the  
267 current study, 44% of participants who identified a positive noted 'Family time' (2). This makes sense  
268 in the context of a crisis, when people become increasingly reliant on their family and community for  
269 support, and especially when under stay-at-home orders which necessitates spending more time  
270 with household members (17). It is plausible that the current study sample found fewer positives,  
271 including of spending time with family, due to the likelihood of those in culturally and linguistically  
272 diverse communities having family ties overseas.

273

274 Our current research, juxtaposed with our previous study, provides an interesting lens into the  
275 experiences of those in culturally and linguistically diverse communities who reported far fewer  
276 positives—23% in the current study compared to 70% in our previous research(2). It adds to a  
277 growing body of evidence which suggests that positive effects of COVID-19 have not been  
278 experienced equally. Our previous research highlighted that while some groups experienced  
279 positives stemming from the COVID-19 restrictions, particularly those living with others and working  
280 from home for pay, others did not and in fact were much more likely to experience adverse events  
281 such as becoming unemployed (18). Additionally, research has expounded the issue that people of  
282 culturally and linguistically diverse groups, as well as women, the unemployed and those of poorer  
283 physical health are more likely to experience mental health issues during COVID-19 (19).

284

285 Although this research reports on the positives experienced by culturally and linguistically diverse  
286 participants, it is imperative to acknowledge that does not suggest the absence of negative effects. It  
287 is apparent that for many people in culturally and linguistically diverse communities, there have  
288 been many challenges attributable to the disruption of the pandemic which are highlighted in our  
289 parallel research. We found broad psychological, financial, and social impacts of the pandemic  
290 including significant numbers of respondents experiencing anxiety and worry, financial stress, and

291 negative impacts on relationships; 25% of participants reported feeling nervous or stressed most or  
292 all of the time over the past week, 22% of participants reported feeling alone or lonely most or all of  
293 the time, 25% reported negative impacts on their relationships and 39% reported a change in  
294 employment status due to pandemic restrictions (13).

295

296 Clearly, the needs of the residents of culturally and linguistically diverse communities in Western  
297 Sydney need to be carefully considered by those in Government to ensure that those who are at  
298 greater risk of pandemic-related disadvantage are supported. It is prudent to foster greater  
299 community engagement, mental health services and economic / structural supports for these  
300 communities, with a focus on the linguistic and cultural barriers communities may face in a system  
301 not specifically designed with them in mind.

302

### 303 [Strengths and limitations](#)

304

305 This study is novel in its use of both Content Analysis and quantitative analysis to determine if any  
306 positive outcomes are to be found in the experiences of a sample of culturally and linguistically  
307 diverse people resident in Sydney, New South Wales. It is the largest Australian survey which  
308 explores the impacts of COVID-19 for people who speak a language other than English at home.

309

310 However, it is important to consider that this investigation into “positives” experienced during the  
311 COVID-19 pandemic is dependent upon a single survey item administered during a specific and short  
312 time—March 21st to July 9th, 2021 when COVID-19 case numbers were low in Australia. Our  
313 previous research from June 2020 reports on a time in which most of Australia was leaving strict  
314 restrictions, but in our current study case numbers and restrictions were heading in the opposite  
315 direction; this may have been reflected in the much lower rate of positives found in this study  
316 amongst these communities.

317

318 It is unknown how the repercussions of lockdown, restrictions and higher risk of COVID-19 may have  
319 influenced culturally and linguistically diverse community members in terms of finding positives. It is  
320 possible that even fewer participants would have reported positives with continued lockdown,  
321 particularly as the communities which we surveyed faced tighter restrictions than the rest of Sydney  
322 as the weeks after the survey progressed, including curfews, limits on outdoor exercise (20) and the  
323 presence of the Australian Defence Force (21). We are unable to explore changes in impacts over  
324 time in this study. Therefore, this brief report should be considered a starting point for further

325 exploration of the themes identified related to positives and it should not be construed as a  
326 definitive source of evidence for the experiences of culturally and linguistically diverse residents in  
327 Western Sydney.

### 328 Conclusion

329

330 Few participants reported finding any positives because of the COVID–19 pandemic and associated  
331 changes to daily life when surveyed between March 21st to July 9th, 2021. This finding is in stark  
332 contrast to related research conducted earlier in the pandemic in which many more people  
333 experienced positives. The needs of people from culturally and linguistically diverse backgrounds  
334 must be strongly considered in future crises responses to promote an equitable effect of any  
335 positives that may arise and importantly to negate any negative effects.

336 References

337

- 338 1. Biden EJ, Greenwood CJ, Macdonald JA, Spry EA, Letcher P, Hutchinson D, et al. Preparing for  
339 Future Adversities: Lessons From the COVID-19 Pandemic in Australia for Promoting Relational  
340 Resilience in Families. *Frontiers in Psychiatry*. 2021;12:1319.
- 341 2. Cornell S, Nickel B, Cvejic E, Bonner C, McCaffery KJ, Ayre J, et al. Positive outcomes associated  
342 with the COVID-19 pandemic in Australia. *Health Promotion Journal of Australia* [Internet].  
343 [cited 2021 May 16];n/a(n/a). Available from:  
344 <https://onlinelibrary.wiley.com/doi/abs/10.1002/hpja.494>
- 345 3. Kleitman S, Fullerton DJ, Zhang LM, Blanchard MD, Lee J, Stankov L, et al. To comply or not  
346 comply? A latent profile analysis of behaviours and attitudes during the COVID-19 pandemic.  
347 *PLOS ONE*. 2021 Jul 29;16(7):e0255268.
- 348 4. Ayre J, Cvejic E, McCaffery K, Copp T, Cornell S, Dodd RH, et al. Contextualising COVID-19  
349 prevention behaviour over time in Australia: Patterns and long-term predictors from April to July  
350 2020 in an online social media sample. *PLOS ONE*. 2021;16(6):1–16.
- 351 5. Williams L, Rollins L, Young D, Fleming L, Grealy M, Janssen X, et al. What have we learned about  
352 positive changes experienced during COVID-19 lockdown? Evidence of the social patterning of  
353 change. *PLOS ONE*. 2021 Jan 5;16(1):e0244873.
- 354 6. Evans S, Mikocka-Walus A, Klas A, Olive L, Sciberras E, Karantzas G, et al. From “It Has Stopped  
355 Our Lives” to “Spending More Time Together Has Strengthened Bonds”: The Varied Experiences  
356 of Australian Families During COVID-19. *Front Psychol*. 2020 Oct 20;11:588667.
- 357 7. Paremoer L, Nandi S, Serag H, Baum F. Covid-19 pandemic and the social determinants of  
358 health. *BMJ*. 2021 Jan 29;372:n129.
- 359 8. Shadmi E, Chen Y, Dourado I, Faran-Perach I, Furler J, Hangoma P, et al. Health equity and  
360 COVID-19: global perspectives. *International Journal for Equity in Health*. 2020 Jun 26;19(1):104.
- 361 9. Smith JA, Judd J. COVID-19: Vulnerability and the power of privilege in a pandemic. *Health  
362 Promotion Journal of Australia*. 2020;31(2):158–60.
- 363 10. COVID-19 in New South Wales (NSW) | covid19data.com.au [Internet]. COVID-19-data-aus.  
364 [cited 2021 Sep 1]. Available from: <https://www.covid19data.com.au/nsw>
- 365 11. New COVID-19 restrictions for Greater Sydney [Internet]. [cited 2021 Sep 1]. Available from:  
366 [https://www.nsw.gov.au/media-releases/new-covid-19-restrictions-for-greater-sydney-23-june-  
367 2021](https://www.nsw.gov.au/media-releases/new-covid-19-restrictions-for-greater-sydney-23-june-2021)
- 368 12. Data - Phidu [Internet]. Torrens University. [cited 2021 Sep 1]. Available from:  
369 <https://phidu.torrens.edu.au/>
- 370 13. Muscat DM, Ayre J, Mac O, Batcup C, Cvejic E, Pickles K, et al. Psychological, social and financial  
371 impact of COVID-19 on culturally and linguistically diverse communities: a cross-sectional  
372 Australian study [Internet]. 2021 Oct [cited 2021 Oct 21] p. 2021.10.19.21265230. Available  
373 from: <https://www.medrxiv.org/content/10.1101/2021.10.19.21265230v1>

- 374 14. Wallace LS, Rogers ES, Roskos SE, Holiday DB, Weiss BD. BRIEF REPORT: Screening Items to  
375 Identify Patients with Limited Health Literacy Skills. *J Gen Intern Med*. 2006 Aug;21(8):874–7.
- 376 15. Statistics c=AU; o=Commonwealth of A ou=Australian B of. Main Features - IRSAD [Internet].  
377 c=AU; o=Commonwealth of Australia; ou=Australian Bureau of Statistics; 2018 [cited 2021 Sep  
378 15]. Available from:  
379 <https://www.abs.gov.au/ausstats/abs@.nsf/Lookup/by%20Subject/2033.0.55.001~2016~Main>  
380 %20Features~IRSAD~20
- 381 16. Weber RP. *Basic content analysis*, 2nd ed. Thousand Oaks, CA, US: Sage Publications, Inc; 1990.  
382 96 p. (Basic content analysis, 2nd ed).
- 383 17. Jenkins M, Hoek J, Jenkin G, Gendall P, Stanley J, Beaglehole B, et al. Silver linings of the COVID-  
384 19 lockdown in New Zealand. *PLOS ONE*. 2021 Apr 1;16(4):e0249678.
- 385 18. Wright L, Steptoe A, Fancourt D. Are we all in this together? Longitudinal assessment of  
386 cumulative adversities by socioeconomic position in the first 3 weeks of lockdown in the UK. *J*  
387 *Epidemiol Community Health*. 2020 Sep 1;74(9):683–8.
- 388 19. Fancourt D, Steptoe A, Bu F. Trajectories of anxiety and depressive symptoms during enforced  
389 isolation due to COVID-19 in England: a longitudinal observational study. *Lancet Psychiatry*.  
390 2021 Feb;8(2):141–9.
- 391 20. Visontay E, Taylor J. Tougher Covid restrictions for western Sydney criticised for threatening  
392 wellbeing of state’s poorest. *The Guardian* [Internet]. 2021 Aug 20 [cited 2021 Sep 27]; Available  
393 from: [https://www.theguardian.com/australia-news/2021/aug/20/tougher-covid-restrictions-](https://www.theguardian.com/australia-news/2021/aug/20/tougher-covid-restrictions-for-western-sydney-criticised-for-threatening-wellbeing-of-states-poorest)  
394 [for-western-sydney-criticised-for-threatening-wellbeing-of-states-poorest](https://www.theguardian.com/australia-news/2021/aug/20/tougher-covid-restrictions-for-western-sydney-criticised-for-threatening-wellbeing-of-states-poorest)
- 395 21. ADF presence in south and west Sydney “intimidating” to diverse communities [Internet]. ABC  
396 Radio National. Australian Broadcasting Corporation; 2021 [cited 2021 Oct 19]. Available from:  
397 [https://www.abc.net.au/radionational/programs/breakfast/adf-presence-south-west-sydney-](https://www.abc.net.au/radionational/programs/breakfast/adf-presence-south-west-sydney-intimidating-diverse-communities/13479524)  
398 [intimidating-diverse-communities/13479524](https://www.abc.net.au/radionational/programs/breakfast/adf-presence-south-west-sydney-intimidating-diverse-communities/13479524)
- 399
